# Supplementary material
Source: Research Square preprint supplement (doi:10.21203/rs.3.rs-9537750/v1)
Supplement: Supplementary file 1 [file fe7eeb71c0626705b99b3bca.docx]

QUESTIONNAIRE

Additional file 1: Data collection questionnaire

This questionnaire was developed as part of the parent study (Dukuzimana et al., 2025) and informed by WHO STARS and related rehabilitation assessment tools. It was adapted for use in this study to capture Community Health Workers’ observations of childhood physical and mental disabilities.

Data collector Name:

Instruction:

Read carefully the question before to answer,

If there is any question you do not understand, ask for more explanation. If there is a question you are not comfortable to answer you can skip it.

Section 1: Demographic information

| 1 | Date | ……. /…/2024 |
| --- | --- | --- |
| 2 | Participants ID | ………… |
| 3 | Name of Health center | ………………. |
| 4 | Address | 1. Village:…… 2. Cell:………. 3. Sector:……... |
| 5 | Sex | 1. Male 2. Female |
| 6 | What is your age? | .......... |
| 7 | What is your Marital status? | 1. Single 2. Married 3. Separated 4. Divorced 5. Widower/widow |
| 8 | What is your highest level of education? | 1. Not educated 2. Primary 3. Secondary 4. University |
| 9 | Role of the participant | 1. CHW |
| 10 | How many years spent in the role of  CHW? | .......... |

Section 2: This section is about you (as CHW) to help us understand your background and role and how you have been prepared to undertake those responsibilities.

| **1** | Approximately how many households in the village are you assisting? | **...........** |
| --- | --- | --- |
| **2** | How often does your cell coordinator or assistant cell coordinator visit to monitor the services you provide? | 1. Very often 2. Frequently 3. Less frequently 4. Never |
| **3** | What kind of incentives do you receive for performing your duties/role? Select all that apply | 1. C-PBF 2. Incentive from event reported through rapid sms 3. None 4. Other, specify.... |
| **4** | How often do you meet performance targets set for you by MoH or RBC | 1. Always 2. Sometimes 3. Never |
| **5** | Since becoming a CHW, have you received any training to help you perform your duties? | 1. Yes 2. No |
| **6** | If yes, what kind of training did you receive? | List all that apply?   1. ..... 2. ..... 3. ...... 4. ...... |

Section 3: Role of CHWs at community level

This section seeks information that can inform rehabilitation needs in Primary health care setting.

| **1.** | How many patients do you receive in a month? Please estimate | .......... |
| --- | --- | --- |
| **2.** | What are the most common health conditions/diseases among the patients you treat? | 1. Infectious diseases (Malaria, HIV, Tuberculosis, Diarrhea diseases) 2. Respiratory diseases 3. Maternal and Child Health conditions 4. Non communicable diseases (hypertension, diabetes, cancer) 5. Malnutrition 6. Mental health conditions 7. Disability conditions 8. Other: ......... |
| **3.** | Approximately, how many cases of patients who need rehabilitation service do you receive in (estimate):   1. a month or 2. a year | 1. per month 2. per year |
| **4** | Which group in the community has the most cases of disability requiring rehabilitation? | 1. Men 2. Women 3. Children |
| **5** | What types of physical/mental disabilities do you observe among children in the community who need rehabilitation? require Tick all that apply | 1. Club feet 2. Genou valgum or varum 3. Vision impaired, 4. hearing impaired 5. Developmental delay 6. Epilepsy 7. Cerebral palsy 8. other, specify...... |

| **6** | What types of physical or mental disabilities do you observe among adults in the community who need rehabilitation? Tick all that apply | 1. Mobility-Physical disabilities 2. Age related conditions 3. Neurological condition in adult (Stroke, multiple sclerosis, spinal cord injury, traumatic brain injury) 4. Epilepsy 5. Vision impaired, 6. Hearing and speaking impaired 7. Other, specify.... |
| --- | --- | --- |
| **7** | How do you handle disability cases available at the community level? | 1. Provide some of the needed treatment 2. Refer to the health center 3. Nothing to do 4. If there is another thing you do tell us ...... |
| **8** | Do you think that people with disabilities can be treated and regain their functional status? | 1. Yes 2. No   5. Don’t know  Briefly Explain your answer...... |
| **9** | Do you use a platform to report disability cases? | 1. Yes 2. No   If yes, state the name of the platform…… |
| **10** | How often do persons with disabilities in the community access rehabilitation services to regain their function? | Always   1. Sometimes 2. Never 3. Don’t know   Please Briefly, Explain your answer..... |

Section 4: Availability and accessibility of rehabilitation services at community level

| **1** | Are rehabilitation services included in the package you’re delivering at the community level. | 1. Yes 2. No |
| --- | --- | --- |
| **2** | If yes, what are the rehabilitation services you are providing? (Select all that apply) | 1. Related to Physical Therapy 2. Related to Occupational Therapy 3. Related to Speech Therapy 4. Assistive Devices / Prosthetics & Orthotics 5. Wound Dressing 6. Mental Health and Psychosocial Support 7. Home Adaptation 8. Other, please specify |
| **3** | If no, what do you think can be the reason? | 1. Lack of knowledge 2. Lack of appropriate materials at community level 3. Lack of appropriate infrastructure at community 4. Overloaded package of CHWs 5. Insufficient number of CHW at village level. |
| **4** | Did you receive any training related to the  management of disability cases? | 1. Yes 2. No |
| **5** | If yes, on question 3, when did you do the recent  training? |  |
| **6** | If yes, on question 3, what was the main topic  covered in that training? | ................... |
| **7** | Is there a way for you to receive information updates related to rehabilitation services | 1. Yes 2. No   If yes state, the state way you get rehab information…… |
| **8** | Are rehabilitation services covered by the  Community Based Health Insurance (Mutuel de Sante) | 1. Yes 2. No   3, I don't know |

| **9** | Do you believe health care providers adequately address the rehabilitation needs of persons with disabilities at primary health care facilities? | 1. Strongly agree 2. I agree 3. Partially agree 4. I disagree |
| --- | --- | --- |
| **10** | Are there any existing referral pathways or collaborations between primary care facilities  and specialized rehabilitation centers in Rwanda? | 1. Yes 2. No 3. I don’t know |
| **11** | What challenges hinder people with disabilities from using rehabilitation services in the community? | 1. Stigma 2. lack of the awareness that service can be available 3. Financial barriers 4. Lack of transportation fees 5. Lack of quality care from service providers 6. Inaccessible health facilities   Others? Please specify |
| **12** | Do you agree that persons with disabilities have equal access to health care services they need as the general population | 1. Strongly agree. 2. I agree. 3. Partially agree. 4. I disagree. |
| **13** | Do you think that people with disabilities get the rehabilitation services they need on time? | 1. Yes, 2. No, 3. I don’t know Briefly explain your answer |

Section 5: Digital rehabilitation at primary health care

| **1** | Are you familiar with the use of digital technologies in the provision of health services? | 1. Yes 2. No |
| --- | --- | --- |
| **3** | How often do you use digital tools in your day-to-day work? | 1. Always 2. Sometimes 3. Rarely 4. never |
| **2** | Which tools are you using to provide digital health  Services? | 1. Smartphone 2. Tablets |

|  |  | 1. Computer 2. Other... 3. None of the above |
| --- | --- | --- |
| **3** | Are there any challenges you face when providing health services using digital tools? | 1. Yes 2. No |
| **4** | If yes, on question 3. What type of challenges have you ever faced? | 1. Lack of internet access 2. Insufficient training 3. Technical issues 4. Lack of the appropriate devices 5. Other , specify... |
| **5** | Have you ever heard or are you familiar with digital  rehabilitation? | 1. Yes 2. No |
| **6** | Do you think that digital rehabilitation can address the challenge of rehabilitation services in primary health care? | 1. Yes, 2. No   **Reasons:**  If yes, why? If not, why? |

References

Kleinitz, P., Sabariego, C., & Cieza, A. (2021). Who systematic assessment of rehabilitation situation (Stars): Results of the field testing in Jordan, Myanmar, Sri Lanka, Solomon Islands, Laos, Haiti, And Guyana. *International Journal of Environmental Research and Public Health*, *18*(21). <https://doi.org/10.3390/ijerph182111549>

Reham Shaheen. (2022). *REHABILITATION NEED ASSESSMENT REPORT Reham SHAHEEN-*

*Rehabilitation Technical Specialist*.

World Health Organization. (2019). *A tool accompanying the Systematic Assessment of Rehabilitation Situation (STARS) GUIDE FOR ACTION*.
